# Supplementary material
Source: PubMed Central journal article supplement (PMC134239)
Supplement: nar_30_16_3615__1.pdf [file nar_30_16_3615__1.pdf]

SUPPLEMENTARY MATERIAL

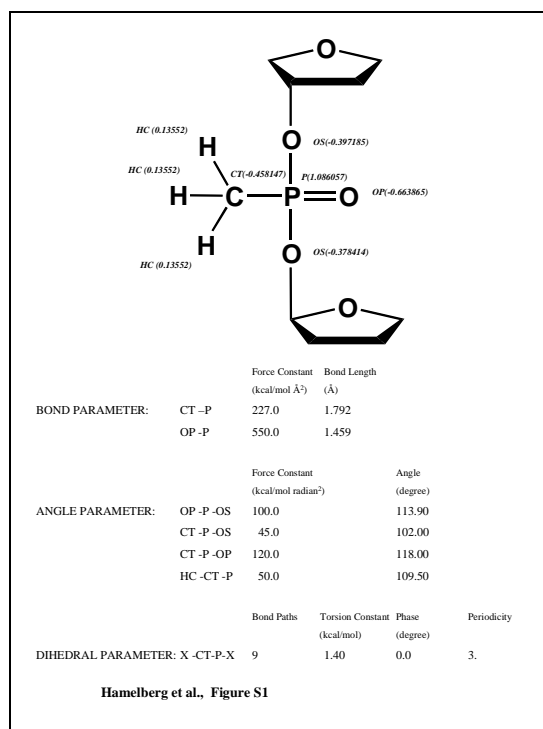

**Figure S1.** The atom types and partial atomic charges of the methylphosphonate moiety were determined as described in the Method section (top). The additional force field parameters used (below).

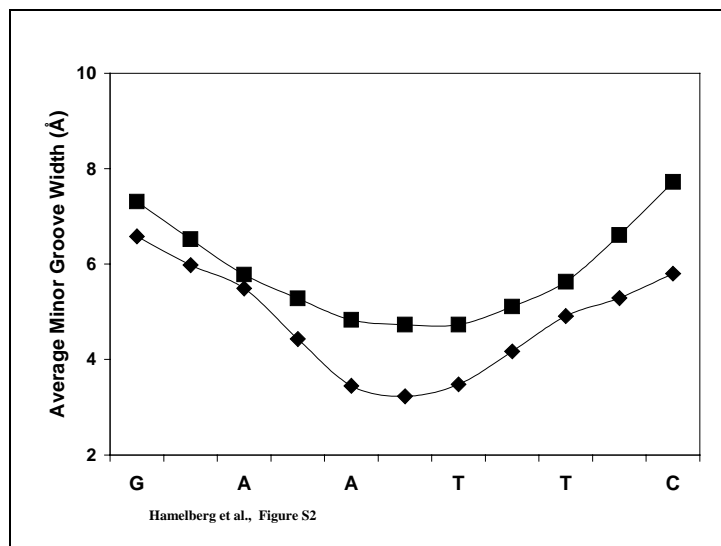

**Figure S2.** Effect of phosphate neutralization on the time-average minor groove width profile of the central A-tract of the AATT duplexes. The black squares show the unmodified AATT duplex, and the black diamonds show the alternating methylphosphonate modified duplex.

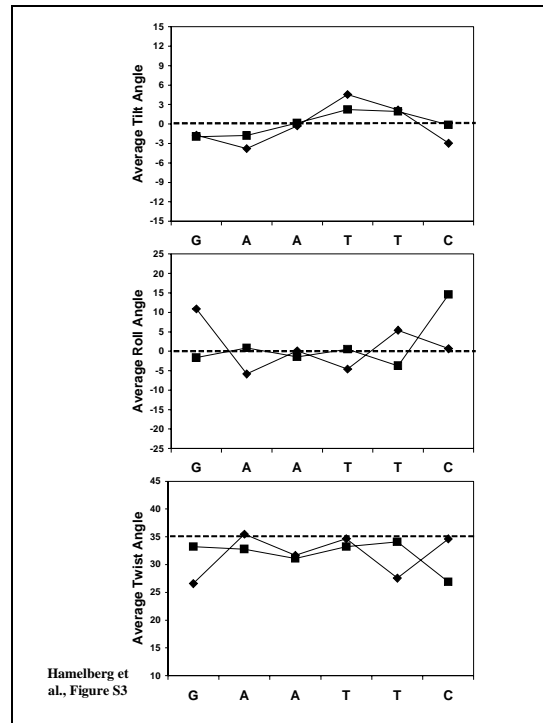

**Figure S3.** Plots of tilt, twist and roll angles of AATT duplexes. Unmodified AATT duplex (squares) and M\_AATT\_ALT (diamonds).
